# Supplementary material
Source: HighWire-hosted journal article supplement (https://cmaj.ca/highwire/filestream/57869/field_highwire_adjunct_files/3/meta-ley-appendix_4.pdf)
Supplement: meta-ley-appendix_4.pdf [file meta-ley-appendix_4.pdf]

**Appendix 4:** NCEP-defined metabolic syndrome (overall and categorical components) and IGT in predicting incident type 2 diabetes after adjustment for age and sex

| Variable             | OR (95% CI)      | <i>p</i> value | C statistic | <i>p</i> value (v. IGT) |
|----------------------|------------------|----------------|-------------|-------------------------|
| Waist circumference* | 2.61 (1.05–6.47) | 0.04           | 0.671       | 0.68                    |
| Triglycerides        | 1.74 (1.02–2.98) | 0.04           | 0.662       | 0.42                    |
| HDL cholesterol*     | 1.65 (1.01–2.71) | 0.046          | 0.664       | 0.51                    |
| Blood pressure       | 2.69 (1.48–4.89) | 0.001          | 0.671       | 0.67                    |
| Blood glucose        | 3.31 (1.70–6.42) | < 0.001        | 0.693       | 0.58                    |
| Metabolic syndrome*  | 2.03 (1.10–3.75) | 0.02           | 0.668       | 0.58                    |
| IGT                  | 2.87 (1.52–5.40) | 0.001          | 0.681       | –                       |

Note: CI = confidence interval; HDL = high-density lipoprotein; IGT = impaired glucose tolerance; NCEP = National Cholesterol Education Program; OR = odds ratio.  
\*Age-specific cutoffs used.
